# Supplementary material
Source: PubMed Central journal article supplement (PMC3674803)
Supplement: supp_ddt111_ddt111supp.pdf [file supp_ddt111_ddt111supp.pdf]

## Supplemental Materials

### Supplemental Data

Supplemental Table 1

| <b>PEG-IGF-I exposure [ug/ml]</b> |                  |                |                |
|-----------------------------------|------------------|----------------|----------------|
| <b>Time (hrs)</b>                 | <b>0.3 mg/kg</b> | <b>1 mg/kg</b> | <b>3 mg/kg</b> |
| <b>0</b>                          | <b>0.00</b>      | <b>0.00</b>    | <b>0.00</b>    |
| <b>6</b>                          | <b>0.76</b>      | <b>2.94</b>    | <b>8.87</b>    |
| <b>24</b>                         | <b>2.51</b>      | <b>2.83</b>    | <b>11.46</b>   |
| <b>48</b>                         | <b>1.00</b>      | <b>3.80</b>    | <b>9.16</b>    |

**Supplemental Table 1: Pharmacokinetics of PEG-IGF-I in *Mecp2*<sup>NULL/Y</sup> mice.** Mice (n=4 for each dose and time point) were injected I.P. with PEG-IGF-I at the dose listed. At the time listed, the animals were euthanized and serum collected for analysis of drug concentration.

**Supplemental Table 2. Complete statistical summary for Figure 2.**

| Symbols key | NULL 0.1 | NULL 0.3 | NULL 1 | NULL Veh | WT veh |
|-------------|----------|----------|--------|----------|--------|
| NULL 0.1    |          | □        | ‡      | ○        | +      |
| NULL 0.3    |          |          | †      | ◇        | ^      |
| NULL 1      |          |          |        | ●        | #      |
| NULL Veh    |          |          |        |          | *      |

| Panel     | Age (wk)      | Statistical Test            | Comparison                  | Statistics              |          |       |       |       |       |
|-----------|---------------|-----------------------------|-----------------------------|-------------------------|----------|-------|-------|-------|-------|
| Weight 2A | 4             | One-way ANOVA               | by genotype-treatment group | F(4, 80)=1.571, p=.190  |          |       |       |       |       |
|           |               | Tukey HSD                   | n                           | 20                      | 12       | 15    | 31    | 7     |       |
|           |               |                             | NULL 0.1                    |                         | NULL 0.3 | 1.000 | 0.292 | 0.871 | 0.980 |
|           |               |                             | NULL 0.3                    |                         |          | 0.395 | 0.911 | 0.988 |       |
|           | NULL 1        |                             |                             |                         |          | 0.718 | 0.271 |       |       |
|           | 5             | One-way ANOVA               | by genotype-treatment group | F(4, 89)=8.334, p<.0001 |          |       |       |       |       |
|           |               | Tukey HSD                   | n                           | 24                      | 12       | 14    | 34    | 10    |       |
|           |               |                             | NULL 0.1                    |                         | NULL 0.3 | 1.000 | 0.000 | 0.463 | 0.691 |
|           |               |                             | NULL 0.3                    |                         |          | 0.001 | 0.713 | 0.759 |       |
|           | NULL 1        |                             |                             |                         |          | 0.004 | 0.000 |       |       |
|           | 6             | One-way ANOVA               | by genotype-treatment group | F(4, 88)=9.507, p<.0001 |          |       |       |       |       |
|           |               | Tukey HSD                   | n                           | 23                      | 12       | 14    | 34    | 10    |       |
| NULL 0.1  |               |                             |                             | NULL 0.3                | 0.973    | 0.000 | 0.738 | 0.143 |       |
| NULL 0.3  |               |                             |                             |                         | 0.000    | 0.482 | 0.527 |       |       |
| NULL 1    |               |                             |                             |                         | 0.005    | 0.000 |       |       |       |
| 7         | One-way ANOVA | by genotype-treatment group | F(4, 81)=5.765, p=.002      |                         |          |       |       |       |       |
|           | Tukey HSD     | n                           | 23                          | 12                      | 11       | 30    | 10    |       |       |
|           |               | NULL 0.1                    |                             | NULL 0.3                | 0.902    | 0.461 | 0.939 | 0.033 |       |
|           |               | NULL 0.3                    |                             |                         | 0.184    | 0.538 | 0.341 |       |       |
| NULL 1    |               |                             |                             |                         | 0.791    | 0.002 |       |       |       |

|                  |    |               |                             |          |                         |          |          |        |       |  |
|------------------|----|---------------|-----------------------------|----------|-------------------------|----------|----------|--------|-------|--|
|                  |    |               | NULL Veh                    |          |                         |          |          |        | 0.004 |  |
|                  |    | One-way ANOVA | by genotype-treatment group |          | F(4, 76)=4.386, p=.003  |          |          |        |       |  |
|                  | 8  |               | n                           | 23       | 11                      | 9        | 28       | 10     |       |  |
|                  |    | Tukey HSD     | NULL 0.1                    | NULL 0.3 | NULL 1                  | NULL Veh | WT veh   |        |       |  |
|                  |    |               | NULL 0.1                    | 0.979    | 0.981                   | 1.000    | 0.005    |        |       |  |
|                  |    |               | NULL 0.3                    |          | 0.877                   | 0.951    | 0.074    |        |       |  |
|                  |    |               | NULL 1                      |          |                         | 0.992    | 0.008    |        |       |  |
|                  |    |               | NULL Veh                    |          |                         |          | 0.002    |        |       |  |
|                  |    | One-way ANOVA | by genotype-treatment group |          | F(4, 66)=6.428, p<.0001 |          |          |        |       |  |
|                  | 9  |               | n                           | 21       | 9                       | 5        | 26       | 10     |       |  |
|                  |    | Tukey HSD     | NULL 0.1                    | NULL 0.3 | NULL 1                  | NULL Veh | WT veh   |        |       |  |
|                  |    |               | NULL 0.1                    | 0.682    | 0.195                   | 1.000    | 0.004    |        |       |  |
|                  |    |               | NULL 0.3                    |          | 0.040                   | 0.733    | 0.298    |        |       |  |
|                  |    |               | NULL 1                      |          |                         | 0.147    | 0.000    |        |       |  |
|                  |    |               | NULL Veh                    |          |                         |          | 0.004    |        |       |  |
|                  |    | One-way ANOVA | by genotype-treatment group |          | F(4, 63)=5.813, p<.0001 |          |          |        |       |  |
|                  | 10 |               | n                           | 20       | 9                       | 5        | 24       | 10     |       |  |
|                  |    | Tukey HSD     | NULL 0.1                    | NULL 0.3 | NULL 1                  | NULL Veh | WT veh   |        |       |  |
|                  |    |               | NULL 0.1                    | 0.663    | 0.132                   | 1.000    | 0.017    |        |       |  |
|                  |    |               | NULL 0.3                    |          | 0.023                   | 0.674    | 0.543    |        |       |  |
|                  |    |               | NULL 1                      |          |                         | 0.110    | 0.000    |        |       |  |
|                  |    |               | NULL Veh                    |          |                         |          | 0.015    |        |       |  |
| Heart rate<br>2B |    | One-way ANOVA | by genotype-treatment group |          | F(4, 59)=.322, p=.862   |          |          |        |       |  |
|                  |    |               | n                           | 13       | 12                      | 7        | 28       | 4      |       |  |
|                  |    | Tukey HSD     | NULL 0.1                    | NULL 0.3 | NULL 1                  | NULL Veh | WT veh   |        |       |  |
|                  |    |               | NULL 0.1                    | .876     | .936                    | .994     | 1.000    |        |       |  |
|                  |    |               | NULL 0.3                    |          | 1.000                   | .956     | .970     |        |       |  |
|                  |    |               | NULL 1                      |          |                         | .984     | .981     |        |       |  |
|                  |    |               | NULL Veh                    |          |                         |          | .999     |        |       |  |
|                  |    | One-way ANOVA | by genotype-treatment group |          | F(4, 49)=2.673, p=.043  |          |          |        |       |  |
|                  |    | 6             |                             | n        | 9                       | 12       | 7        | 20     | 6     |  |
|                  |    |               | Tukey HSD                   | NULL 0.1 | NULL 0.3                | NULL 1   | NULL Veh | WT veh |       |  |
|                  |    |               | NULL 0.1                    | 0.166    | 0.066                   | 0.589    | 0.999    |        |       |  |
|                  |    |               | NULL 0.3                    |          | 0.942                   | 0.778    | 0.401    |        |       |  |

|            |    |               |                             |                         |          |        |          |        |
|------------|----|---------------|-----------------------------|-------------------------|----------|--------|----------|--------|
|            |    |               | NULL 1                      |                         |          | 0.398  | 0.183    |        |
|            |    |               | NULL Veh                    |                         |          |        | 0.854    |        |
|            | 7  | One-way ANOVA | by genotype-treatment group | F(4, 51)=5.721, p=.001  |          |        |          |        |
|            |    | Tukey HSD     | n                           | 18                      | 11       | 4      | 20       | 3      |
|            |    |               |                             | NULL 0.1                | NULL 0.3 | NULL 1 | NULL Veh | WT veh |
|            |    |               |                             | NULL 0.1                | 0.012    | 0.005  | 0.599    | 0.970  |
|            |    |               |                             | NULL 0.3                |          | 0.724  | 0.203    | 0.089  |
|            |    |               | NULL 1                      |                         | 0.050    | 0.022  |          |        |
|            |    |               | NULL Veh                    |                         |          |        | 0.634    |        |
|            | 8  | One-way ANOVA | by genotype-treatment group | F(3, 46)=3.399, p=.025  |          |        |          |        |
|            |    | Tukey HSD     | n                           | 14                      | 9        |        | 22       | 5      |
|            |    |               |                             | NULL 0.1                | NULL 0.3 | NULL 1 | NULL Veh | WT veh |
|            |    |               |                             | NULL 0.1                | 0.133    |        | 0.100    | 0.631  |
|            |    |               |                             | NULL 0.3                |          |        | 0.984    | 0.037  |
|            |    |               | NULL 1                      |                         |          | 0.038  |          |        |
|            | 9  | One-way ANOVA | by genotype-treatment group | F(3, 46)=5.546, p=.002  |          |        |          |        |
|            |    | Tukey HSD     | n                           | 14                      | 9        |        | 20       | 7      |
|            |    |               |                             | NULL 0.1                | NULL 0.3 | NULL 1 | NULL Veh | WT veh |
|            |    |               |                             | NULL 0.1                | 0.068    |        | 0.664    | 0.060  |
|            |    |               |                             | NULL 0.3                |          |        | 0.335    | 0.000  |
|            |    |               | NULL 1                      |                         |          | 0.005  |          |        |
|            | 10 | One-way ANOVA | by genotype-treatment group | F(3, 39)=8.276, p<.0001 |          |        |          |        |
|            |    | Tukey HSD     | n                           | 11                      | 8        |        | 16       | 8      |
|            |    |               |                             | NULL 0.1                | NULL 0.3 | NULL 1 | NULL Veh | WT veh |
|            |    |               |                             | NULL 0.1                | 0.030    |        | 0.556    | 0.030  |
|            |    |               |                             | NULL 0.3                |          |        | 0.241    | 0.000  |
|            |    |               | NULL 1                      |                         |          | 0.001  |          |        |
| Glucose 2C | 4  | One-way ANOVA | by genotype-treatment group | F(4, 48)=.493, p=.741   |          |        |          |        |
|            |    | Tukey HSD     | n                           | 5                       | 12       | 7      | 24       | 5      |
|            |    |               |                             | NULL 0.1                | NULL 0.3 | NULL 1 | NULL Veh | WT veh |
|            |    | NULL 0.1      | 0.820                       | 0.995                   | 0.892    | 0.757  |          |        |
|            |    |               | NULL 0.3                    |                         | 0.951    | 0.997  | 0.997    |        |

|   |               |                             |          |                         |        |       |        |
|---|---------------|-----------------------------|----------|-------------------------|--------|-------|--------|
|   |               | NULL 1                      |          |                         | 0.986  | 0.897 |        |
|   |               | NULL Veh                    |          |                         |        | 0.971 |        |
|   | One-way ANOVA | by genotype-treatment group |          | F(4, 61)=3.002, p=.025  |        |       |        |
| 5 | Tukey HSD     | n                           | 10       | 12                      | 5      | 29    |        |
|   |               |                             |          | NULL                    |        | NULL  |        |
|   |               |                             | NULL 0.1 | 0.3                     | NULL 1 | Veh   | WT veh |
|   |               | NULL 0.1                    |          | 0.116                   | 0.806  | 0.990 | 0.161  |
|   |               | NULL 0.3                    |          |                         | 0.917  | 0.091 | 1.000  |
|   |               | NULL 1                      |          |                         | 0.899  | 0.937 |        |
|   |               | NULL Veh                    |          |                         |        | 0.149 |        |
|   | One-way ANOVA | by genotype-treatment group |          | F(4, 61)=5.312, p=.001  |        |       |        |
| 6 | Tukey HSD     | n                           | 9        | 12                      | 7      | 28    |        |
|   |               |                             |          | NULL                    |        | NULL  |        |
|   |               |                             | NULL 0.1 | 0.3                     | NULL 1 | Veh   | WT veh |
|   |               | NULL 0.1                    |          | 0.001                   | 0.027  | 0.265 | 0.026  |
|   |               | NULL 0.3                    |          |                         | 0.987  | 0.040 | 0.908  |
|   |               | NULL 1                      |          |                         | 0.382  | 0.999 |        |
|   |               | NULL Veh                    |          |                         |        | 0.437 |        |
|   | One-way ANOVA | by genotype-treatment group |          | F(4, 62)=5.908, p<.0001 |        |       |        |
| 7 | Tukey HSD     | n                           | 9        | 12                      | 7      | 29    |        |
|   |               |                             |          | NULL                    |        | NULL  |        |
|   |               |                             | NULL 0.1 | 0.3                     | NULL 1 | Veh   | WT veh |
|   |               | NULL 0.1                    |          | 0.005                   | 0.000  | 0.028 | 0.006  |
|   |               | NULL 0.3                    |          |                         | 0.719  | 0.696 | 1.000  |
|   |               | NULL 1                      |          |                         | 0.110  | 0.796 |        |
|   |               | NULL Veh                    |          |                         |        | 0.670 |        |
|   | One-way ANOVA | by genotype-treatment group |          | F(4, 54)=3.795, p=.009  |        |       |        |
| 8 | Tukey HSD     | n                           | 9        | 11                      | 4      | 25    |        |
|   |               |                             |          | NULL                    |        | NULL  |        |
|   |               |                             | NULL 0.1 | 0.3                     | NULL 1 | Veh   | WT veh |
|   |               | NULL 0.1                    |          | 0.043                   | 0.512  | 0.214 | 0.005  |
|   |               | NULL 0.3                    |          |                         | 0.977  | 0.713 | 0.896  |
|   |               | NULL 1                      |          |                         | 0.999  | 0.728 |        |
|   |               | NULL Veh                    |          |                         |        | 0.169 |        |
|   | One-way ANOVA | by genotype-treatment group |          | F(3, 46)=6.645, p=.001  |        |       |        |
| 9 | Tukey HSD     | n                           | 9        | 9                       |        | 22    |        |
|   |               |                             |          | NULL                    |        | NULL  |        |
|   |               |                             | NULL 0.1 | 0.3                     | NULL 1 | Veh   | WT veh |
|   |               |                             |          |                         | 0.066  | 0.001 |        |
|   |               | NULL 0.3                    |          |                         | 0.387  | 0.950 |        |

|                           |               |                             |                             |                        |          |          |        |    |       |
|---------------------------|---------------|-----------------------------|-----------------------------|------------------------|----------|----------|--------|----|-------|
|                           |               |                             | NULL 1<br>NULL Veh          |                        |          |          |        |    | 0.111 |
|                           | 10            | One-way ANOVA               | by genotype-treatment group | F(4, 45)=3.707, p=.011 |          |          |        |    |       |
|                           |               | Tukey HSD                   | n                           | 7                      | 9        | 4        | 20     | 10 |       |
|                           |               |                             | NULL 0.1                    | NULL 0.3               | NULL 1   | NULL Veh | WT veh |    |       |
|                           |               |                             | NULL 0.1                    | 0.010                  | 0.722    | 0.301    | 0.035  |    |       |
|                           |               |                             | NULL 0.3                    |                        | 0.500    | 0.193    | 0.973  |    |       |
|                           |               |                             | NULL 1                      |                        |          | 1.000    | 0.774  |    |       |
|                           |               |                             | NULL Veh                    |                        |          |          | 0.524  |    |       |
| Glucose tolerance test 2D | 6             | One-way ANOVA               | by genotype-treatment group | F(4, 25)=1.123, p=.368 |          |          |        |    |       |
|                           |               | Tukey HSD                   | n                           | 6                      | 4        | 2        | 14     | 4  |       |
|                           |               |                             | NULL 0.1                    | NULL 0.3               | NULL 1   | NULL Veh | WT veh |    |       |
|                           |               |                             | NULL 0.1                    | 0.524                  | 0.918    | 0.931    | 0.408  |    |       |
|                           |               |                             | NULL 0.3                    |                        | 0.995    | 0.797    | 1.000  |    |       |
|                           |               |                             | NULL 1                      |                        |          | 0.995    | 0.982  |    |       |
|                           |               |                             | NULL Veh                    |                        |          |          | 0.669  |    |       |
|                           | 7-8           | One-way ANOVA               | by genotype-treatment group | F(4, 30)=4.778, p=.004 |          |          |        |    |       |
|                           |               | Tukey HSD                   | n                           | 6                      | 8        | 3        | 14     | 4  |       |
|                           |               |                             | NULL 0.1                    | NULL 0.3               | NULL 1   | NULL Veh | WT veh |    |       |
|                           |               |                             | NULL 0.1                    | 0.846                  | 0.995    | 0.994    | 0.019  |    |       |
|                           |               |                             | NULL 0.3                    |                        | 0.740    | 0.454    | 0.095  |    |       |
|                           |               | NULL 1                      |                             |                        | 1.000    | 0.027    |        |    |       |
|                           |               | NULL Veh                    |                             |                        |          | 0.002    |        |    |       |
| 9-11                      | One-way ANOVA | by genotype-treatment group | F(4, 25)=3.782, p=.023      |                        |          |          |        |    |       |
|                           | Tukey HSD     | n                           | 5                           | 8                      |          | 12       | 4      |    |       |
|                           |               | NULL 0.1                    | NULL 0.3                    | NULL 1                 | NULL Veh | WT veh   |        |    |       |
|                           |               | NULL 0.1                    | 0.115                       |                        | 1.000    | 0.305    |        |    |       |
|                           |               | NULL 0.3                    |                             |                        | 0.040    | 0.996    |        |    |       |
|                           |               | NULL 1                      |                             |                        |          |          |        |    |       |
|                           |               | NULL Veh                    |                             |                        |          | 0.209    |        |    |       |

**Supplemental Table 3. Complete statistical summary for Figure 4.**

Symbols key

|          |          |          |        |        |
|----------|----------|----------|--------|--------|
|          | NULL INS | NULL VEH | WT INS | WT VEH |
| NULL INS |          | ‡        | ○      | +      |
| NULL VEH |          |          | ^      | *      |
| WT INS   |          |          |        | #      |

| Panel     | Age (wk)      | Statistical Test            | Comparison                  | Statistics             |        |        |   |
|-----------|---------------|-----------------------------|-----------------------------|------------------------|--------|--------|---|
| Weight 4A | 4             | One-way ANOVA               | by genotype-treatment group | F(3, 28)=.871, p=.468  |        |        |   |
|           |               | Tukey HSD                   | n                           | 8                      | 8      | 8      | 8 |
|           |               |                             | NULL INS                    | NULL VEH               | WT INS | WT VEH |   |
|           |               |                             | NULL INS                    | 0.581                  | 0.632  | 0.996  |   |
|           | NULL VEH      |                             | 1.000                       | 0.715                  |        |        |   |
|           | WT INS        |                             |                             | 0.762                  |        |        |   |
|           | 5             | One-way ANOVA               | by genotype-treatment group | F(3, 28)=3.651, p=.024 |        |        |   |
|           |               | Tukey HSD                   | n                           | 8                      | 8      | 8      | 8 |
|           |               |                             | NULL INS                    | NULL VEH               | WT INS | WT VEH |   |
|           |               |                             | NULL INS                    | 0.511                  | 0.016  | 0.178  |   |
|           | NULL VEH      |                             | 0.280                       | 0.896                  |        |        |   |
|           | WT INS        |                             |                             | 0.675                  |        |        |   |
| 6         | One-way ANOVA | by genotype-treatment group | F(3, 28)=10.698, p<.0001    |                        |        |        |   |
|           | Tukey HSD     | n                           | 8                           | 8                      | 8      | 8      |   |
|           |               | NULL INS                    | NULL VEH                    | WT INS                 | WT VEH |        |   |
|           |               | NULL INS                    | 0.522                       | 0.000                  | 0.003  |        |   |
| NULL VEH  |               | 0.005                       | 0.073                       |                        |        |        |   |
| WT INS    |               |                             | 0.681                       |                        |        |        |   |
| 7         | One-way ANOVA | by genotype-treatment group | F(3, 27)=20.032, p<.0001    |                        |        |        |   |
|           | Tukey HSD     | n                           | 7                           | 8                      | 8      | 8      |   |
| NULL INS  |               | NULL VEH                    | WT INS                      | WT VEH                 |        |        |   |
| NULL INS  | 0.976         | 0.000                       | 0.000                       |                        |        |        |   |
| NULL VEH  |               | 0.000                       | 0.000                       |                        |        |        |   |

|               |               |                             |                          |          |          |        |        |
|---------------|---------------|-----------------------------|--------------------------|----------|----------|--------|--------|
|               |               | WT INS                      |                          | 0.742    |          |        |        |
| 8             | One-way ANOVA | by genotype-treatment group | F(3, 26)=17.896, p<.0001 |          |          |        |        |
|               | Tukey HSD     | n                           | 7                        | 8        | 7        | 8      |        |
|               |               |                             | NULL INS                 | NULL VEH | WT INS   | WT VEH |        |
| NULL INS      |               |                             | 0.999                    | 0.000    | 0.000    |        |        |
| NULL VEH      |               |                             | 0.000                    | 0.000    |          |        |        |
| WT INS        |               |                             |                          | 0.970    |          |        |        |
| 9             | One-way ANOVA | by genotype-treatment group | F(3, 25)=64.667, p<.0001 |          |          |        |        |
|               | Tukey HSD     | n                           | 6                        | 8        | 7        | 8      |        |
|               |               |                             | NULL INS                 | NULL VEH | WT INS   | WT VEH |        |
| NULL INS      |               |                             | 0.543                    | 0.000    | 0.000    |        |        |
| NULL VEH      |               |                             | 0.000                    | 0.000    |          |        |        |
| WT INS        |               |                             |                          | 0.972    |          |        |        |
| 10            | One-way ANOVA | by genotype-treatment group | F(3, 25)=63.209, p<.0001 |          |          |        |        |
|               | Tukey HSD     | n                           | 6                        | 8        | 7        | 8      |        |
|               |               |                             | NULL INS                 | NULL VEH | WT INS   | WT VEH |        |
| NULL INS      |               |                             | 0.263                    | 0.000    | 0.000    |        |        |
| NULL VEH      |               |                             | 0.000                    | 0.000    |          |        |        |
| WT INS        |               |                             |                          | 0.996    |          |        |        |
| Heart rate 4B | One-way ANOVA | by genotype-treatment group | F(3, 11)=.998, p=.430    |          |          |        |        |
|               | 5             | Tukey HSD                   | n                        | 4        | 3        | 4      | 4      |
|               |               |                             |                          | NULL INS | NULL VEH | WT INS | WT VEH |
|               |               |                             | NULL INS                 |          | 0.884    | 0.429  | 0.539  |
|               | NULL VEH      |                             |                          | 0.882    | 0.946    |        |        |
|               | WT INS        |                             |                          |          | 0.997    |        |        |
| 6             | One-way ANOVA | by genotype-treatment group | F(3, 28)=1.401, p=.263   |          |          |        |        |
|               | Tukey HSD     | n                           | 8                        | 8        | 8        | 8      |        |
|               |               |                             | NULL INS                 | NULL VEH | WT INS   | WT VEH |        |
| NULL INS      |               |                             | 0.369                    | 0.844    | 0.286    |        |        |
| NULL VEH      |               |                             | 0.841                    | 0.998    |          |        |        |



|            |               |                             |                          |          |        |        |
|------------|---------------|-----------------------------|--------------------------|----------|--------|--------|
|            |               | WT INS                      |                          | 0.752    |        |        |
| 7          | One-way ANOVA | by genotype-treatment group | F(3, 26)=12.621, p<.000  |          |        |        |
|            | Tukey HSD     | n                           | 7                        | 8        | 7      | 8      |
|            |               | NULL INS                    | NULL INS                 | NULL VEH | WT INS | WT VEH |
| NULL INS   |               |                             | 0.068                    | 0.000    | 0.001  |        |
| NULL VEH   |               |                             | 0.013                    | 0.204    |        |        |
| WT INS     |               |                             |                          | 0.523    |        |        |
| 8          | One-way ANOVA | by genotype-treatment group | F(2, 8)=2.516, p=.142    |          |        |        |
|            | Tukey HSD     | n                           | 4                        | 3        | 4      |        |
|            |               | NULL INS                    | NULL INS                 | NULL VEH | WT INS | WT VEH |
| NULL INS   |               |                             |                          | 0.546    | 0.123  |        |
| NULL VEH   |               |                             |                          | 0.605    |        |        |
| WT INS     |               |                             |                          |          |        |        |
| 9          | One-way ANOVA | by genotype-treatment group | F(3, 25)=21.470, p<.0001 |          |        |        |
|            | Tukey HSD     | n                           | 6                        | 8        | 7      | 8      |
|            |               | NULL INS                    | NULL INS                 | NULL VEH | WT INS | WT VEH |
| NULL INS   |               |                             | 0.481                    | 0.000    | 0.000  |        |
| NULL VEH   |               |                             | 0.000                    | 0.001    |        |        |
| WT INS     |               |                             |                          | 0.590    |        |        |
| 10         | One-way ANOVA | by genotype-treatment group | F(3, 25)=17.839, p<.000  |          |        |        |
|            | Tukey HSD     | n                           | 6                        | 8        | 7      | 8      |
|            |               | NULL INS                    | NULL INS                 | NULL VEH | WT INS | WT VEH |
| NULL INS   |               |                             | 0.059                    | 0.000    | 0.000  |        |
| NULL VEH   |               |                             | 0.002                    | 0.010    |        |        |
| WT INS     |               |                             |                          | 0.901    |        |        |
| Glucose 4C | One-way ANOVA | by genotype-treatment group | F(3, 28)=2.804, p=.058   |          |        |        |
|            | Tukey HSD     | n                           | 8                        | 8        | 8      | 8      |
|            |               | NULL INS                    | NULL VEH                 | WT INS   | WT VEH |        |
|            |               | NULL INS                    |                          | 1.000    | 0.710  | 0.082  |

|          |               |                             |                          |          |        |        |
|----------|---------------|-----------------------------|--------------------------|----------|--------|--------|
|          |               | NULL VEH                    |                          | 0.710    | 0.082  |        |
|          |               | WT INS                      |                          |          | 0.493  |        |
| 6-7      | One-way ANOVA | by genotype-treatment group | F(3, 35)=11.718, p<.0001 |          |        |        |
|          | Tukey HSD     | n                           | 9                        | 10       | 10     | 10     |
|          |               |                             |                          | NULL VEH | WT INS | WT VEH |
|          |               | NULL INS                    |                          | 0.053    | 0.000  | 0.000  |
| NULL VEH |               |                             |                          | 0.262    | 0.027  |        |
| WT INS   |               |                             |                          | 0.693    |        |        |
| >8       | One-way ANOVA | by genotype-treatment group | F(3, 22)=18.557, p<.0001 |          |        |        |
|          | Tukey HSD     | n                           | 3                        | 7        | 8      | 8      |
|          |               |                             |                          | NULL VEH | WT INS | WT VEH |
|          |               | NULL INS                    |                          | 0.512    | 0.000  | 0.000  |
| NULL VEH |               |                             |                          | 0.000    | 0.000  |        |
| WT INS   |               |                             |                          | 0.976    |        |        |

**Supplemental Figure 1**

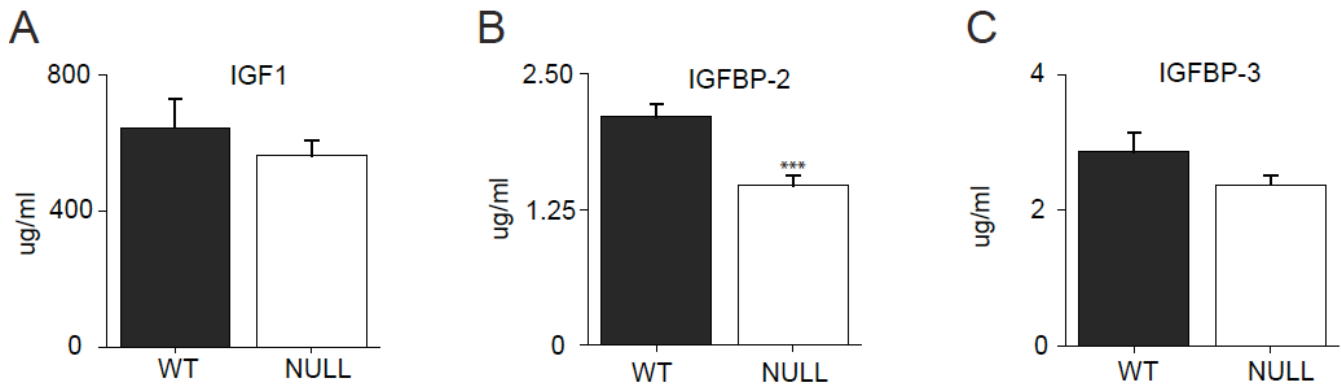

**Figure S1. NULL mice have a metabolic syndrome. (A)** At 9-14 weeks age, NULL mice (n=10) had unchanged IGF-I compared to WT mice (n=14). **(B)** In contrast, IGFBP-2 was decreased in NULL animals compared to WT animals. **(C)** IGFBP-3 levels were comparable between NULL and WT mice.

\*\*\*p<0.001. Error bars are SEM.

## Supplemental Figure 2

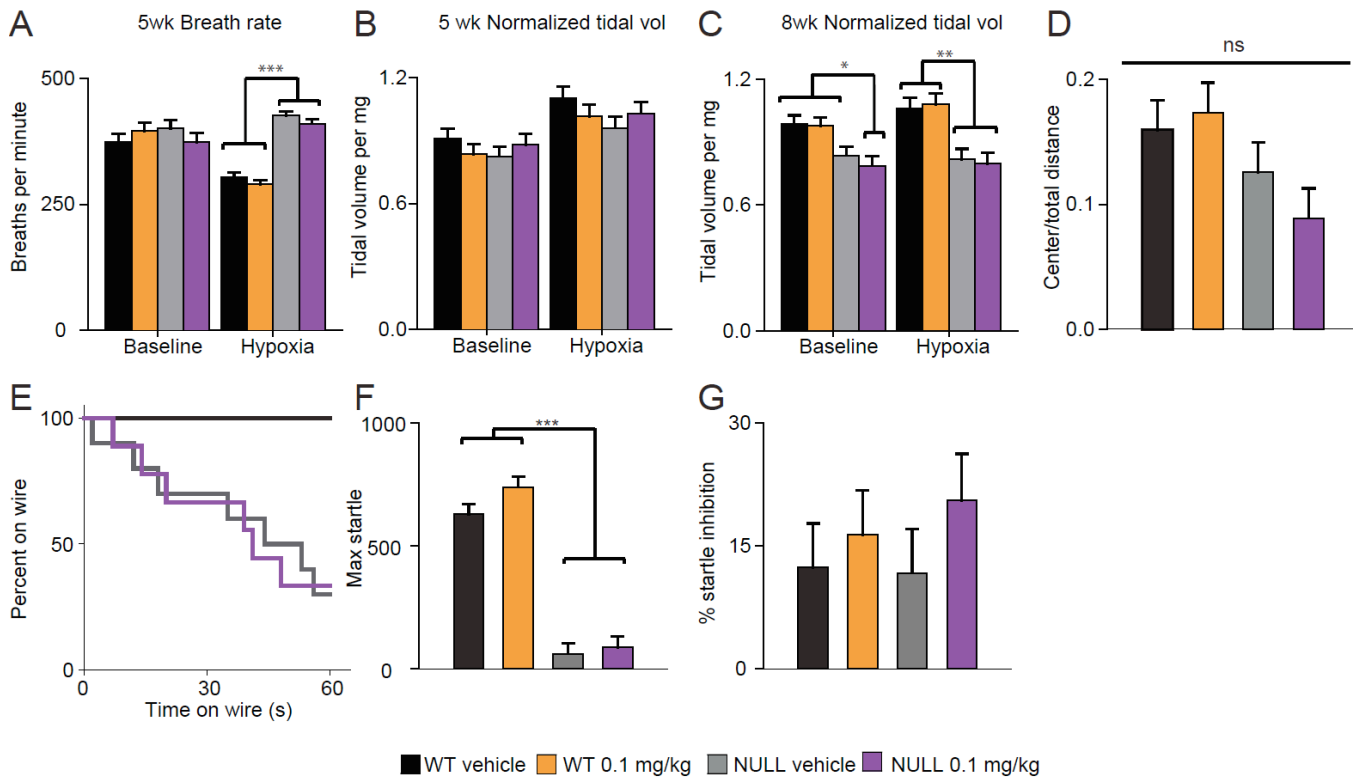

**Figure S2. Treatment of NULL animals with 0.1mg/kg PEG-IGF-I.** (A) Treatment with 0.1mg/kg PEG-IGF-I did not correct the abnormal breathing response seen in NULL animals at 5 weeks age. (B, C) Additionally, treatment had no effect on normalized tidal volume at 5 weeks or 8 weeks of age, either at baseline or when exposed to hypoxia. (D) Center/total distance traveled ratio in the open field was unaffected by treatment. (E) NULL mice perform poorly on the wire hanging task, and this was unaffected by treatment. (F, G) Neither acoustic startle nor prepulse inhibition was affected by treatment. NULL 0.1mg/kg n=9, for all others n=10. \* p<0.05, \*\*p<0.01, \*\*\*p<0.001. Error bars are SEM.

### Supplemental Figure 3

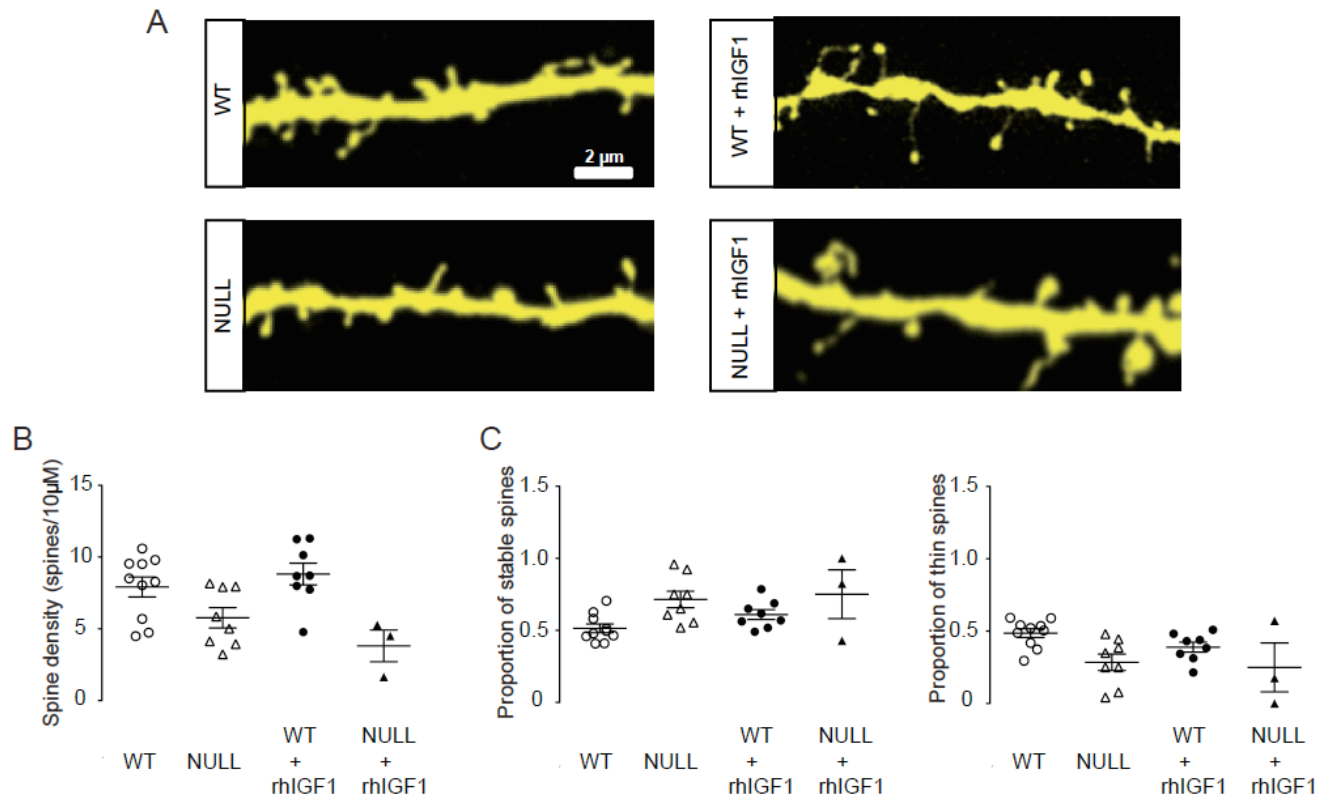

**Figure S3. Treatment with rhIGF-I does not improve spine density in hippocampal neurons from NULL mice.** (A) *Mecp2*<sup>NULL/Y</sup> mice show lower density of dendritic spines in pyramidal neurons from several brain regions (1), including the hippocampus (2). Intriguingly, treatment with the N-terminal tripeptide of IGF1 ameliorates this spine phenotype in pyramidal neurons of the visual cortex (3). To determine if full length recombinant human IGF1 is also effective at reversing this phenotype in *Mecp2*<sup>NULL/Y</sup> neurons, we treated hippocampal slice cultures containing eYFP-expressing CA1 and CA3 pyramidal neurons with rh-IGF1. Using confocal microscopy, dendritic spines were identified as small protrusions that extended from the parent dendrite. Pyramidal neurons in slices from *Mecp2*<sup>NULL/Y</sup> mice have a lower spine density than that of wild type littermates (5.77±0.71 spines per 10µm of dendrite, n=8 cells vs. 7.92±0.69 spines/10µm, n=10; p=0.0038, ANOVA, Newman-Keuls). In addition, the proportion of morphological types of spines in *Mecp2*<sup>NULL/Y</sup> slices is significantly biased towards the more stable spine types (stubby and mushroom) in detriment of more motile thin spines compared to wild-type slices (p<0.05). (B) 48h exposure to 50µg/mL rh-IGF-1 did not affect spine density neither in wild-type neurons (8.81±0.76 spines/10µm, n=8) nor in *Mecp2*<sup>NULL/Y</sup> ones (3.81±1.10 spines/10µm, n=3; p>0.05, compared to saline-treated controls). (C) Similarly, rh-IGF-1 did not affect the proportions of dendritic spine types in neither of the genotypes (p>0.05).

### Supplemental Figure 4

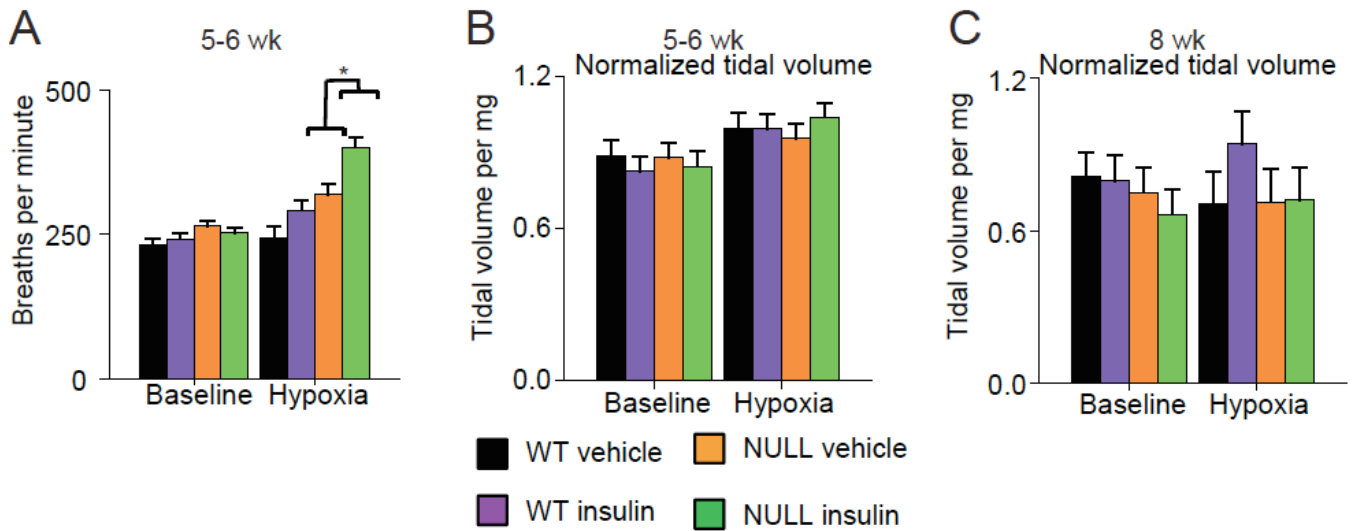

**Figure S4. Treatment of NULL animals with insulin.** (A) Surprisingly, treatment with insulin increased the breathing response to hypoxia in both WT as well as NULL animals, but had no effect on breathing rates at baseline in either genotype. (B, C) Insulin treatment had no effect on tidal volume at 5-6 weeks or 8 weeks age in either genotype in either baseline breathing or during exposure to hypoxia. At 5-6 weeks age n=10 for each group in each segment. At 8 weeks age NULL 0.1mg/kg n=9, all others n=10. \* p<0.05, \*\*p<0.01, \*\*\*p<0.001. Error bars are SEM.

## Supplemental Materials and Methods

**Quantitative confocal microscopy of dendritic spines.** Organotypic cultures of hippocampal slices were prepared from postnatal day 5-8 *Mecp2*<sup>NULL/Y</sup> mice and wild-type littermates following standard procedures (4). At 4 days in vitro (DIV) media serum was titrated to serum-free conditions using Neurobasal-A with B-27 and L-glutamine supplementation. After 7 DIV, cDNA plasmids encoding enhanced Yellow Fluorescent Protein (eYFP, Clontech) were introduced by biolistic gene transfer using a Helios handheld gene gun (Bio-Rad). After 48 hours of expression, slice cultures were randomly assigned to treatment with 50µg/ml rhIGF-I or vehicle (0.9% NaCl). After 48 hours, slice cultures were fixed by immersion in 4% paraformaldehyde and mounted in glass slides with Vectashield (Vector labs). eYFP-expressing CA1 and CA3 pyramidal neurons were imaged in a Fluoview FV-300 laser-scanning confocal microscope (Olympus) using an oil immersion 63x (NA 1.45) objective lens (PlanApo). eYFP was excited with the 488nm line of an Ar laser and its fluorescence emission detected using standard FITC filters (Semrock). Individual secondary or tertiary branches of apical dendrites were imaged using a 3X digital zoom, and optical sections were acquired at 0.1µm intervals in the Z-axis using pinhole aperture 1. The x-y resolution is 0.09µm, measured with fluorescence microspheres. Dendritic spines were identified as small protrusions that extended from the parent dendrite, and detected semi-automatically in maximum-intensity projections of the confocal z-stacks using NeuronStudio (5). Spine density was calculated by quantifying the number of spines per dendritic segment, and normalized to 10µm of dendritic length. Data were analyzed using ANOVA followed by Newman-Keuls t-test post-hoc.

## Supplemental References

- 1 Belichenko, P. (2009) Widespread changes in dendritic and axonal morphology in Mecp2-mutant mouse models of Rett syndrome: evidence for disruption of neuronal networks. *J. Comp. Neurol.*, **514**, 240-258.
- 2 Chapleau, C.A., Boggio, E.M., Calfa, G., Percy, A.K., Giustetto, M. and Pozzo-Miller, L. (2012) Hippocampal CA1 Pyramidal Neurons of Mecp2 Mutant Mice Show a Dendritic Spine Phenotype Only in the Presymptomatic Stage. *Neural plasticity*, **2012**, 976164.
- 3 Tropea, D. (2009) Partial reversal of Rett Syndrome-like symptoms in MeCP2 mutant mice. *PNAS*, **106**, 2029-2034.
- 4 Chapleau, C. (2008) The actions of BDNF on dendritic spine density and morphology in organotypic slice culture depend on the presence of serum in culture media. *J. Neurosci. Methods*, **169**, 182-190.
- 5 Rodriguez, A. (2008) Automated three-dimensional detection and shape classification of dendritic spines from fluorescence microscopy images. *PloS one*, **3**, e1997.
